# Supplementary material for: Origin of Heat Capacity Changes in a “Nonclassical” Hydrophobic Interaction
Source: PubMed Central journal article supplement (PMC2435424; doi:10.1002/cbic.200700281), 2007-07-12
Supplement: cbic0008-1509-SD1.pdf [file cbic0008-1509-SD1.pdf]

**CHEM**BIOCHEM

## Supporting Information

© Copyright Wiley-VCH Verlag GmbH & Co. KGaA, 69451 Weinheim, 2007
